# Supplementary material
Source: publisher site journal article supplement (https://www.dovepress.com/article/367190)
Supplement: Supplementary file 1 [file get_supplementary_file.php]

**Supplementary materials**

**Moderate Intensity Ultrasound-Triggered On-demand Analgesia for Postoperative Pain Management**

|  | Size | Size distribution | Potential | Loading Efficiency |
| --- | --- | --- | --- | --- |
| DMSN-bupi-PFP | 485 nm | 220.2-712.4 nm | -41.14mV | 91% |

**Table S1.** Basic characteristic of DMSN-bupi-PFP.


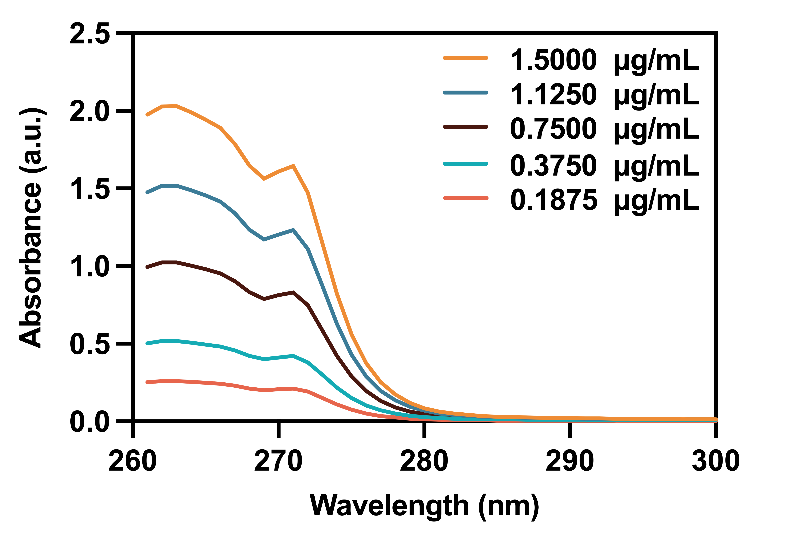


**Figure S1.** UV-Vis spectrum of levobupivacaine.


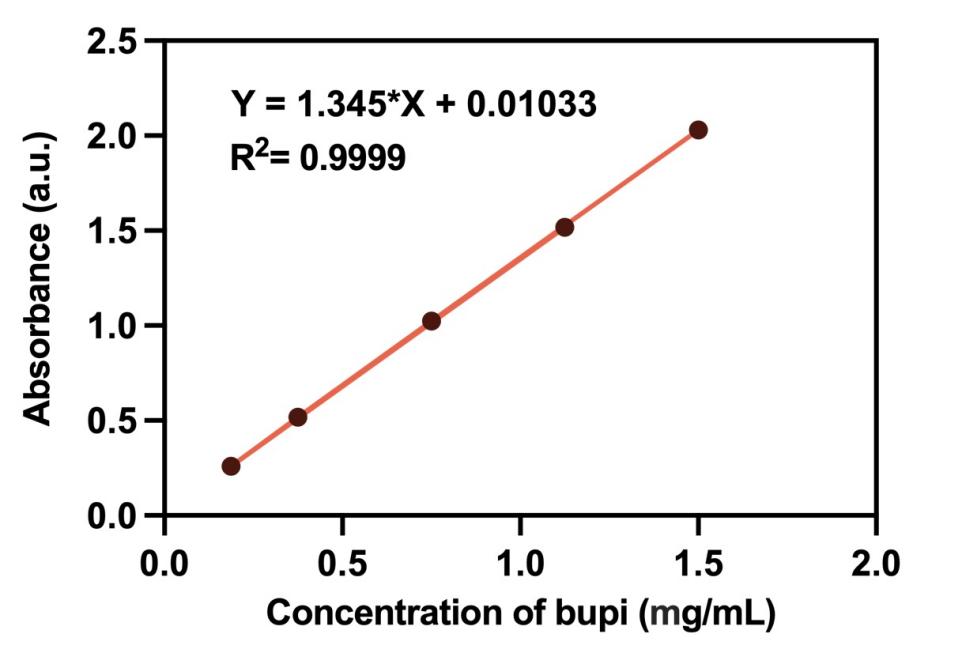


Figure S2. Standard curve of levobupivacaine.


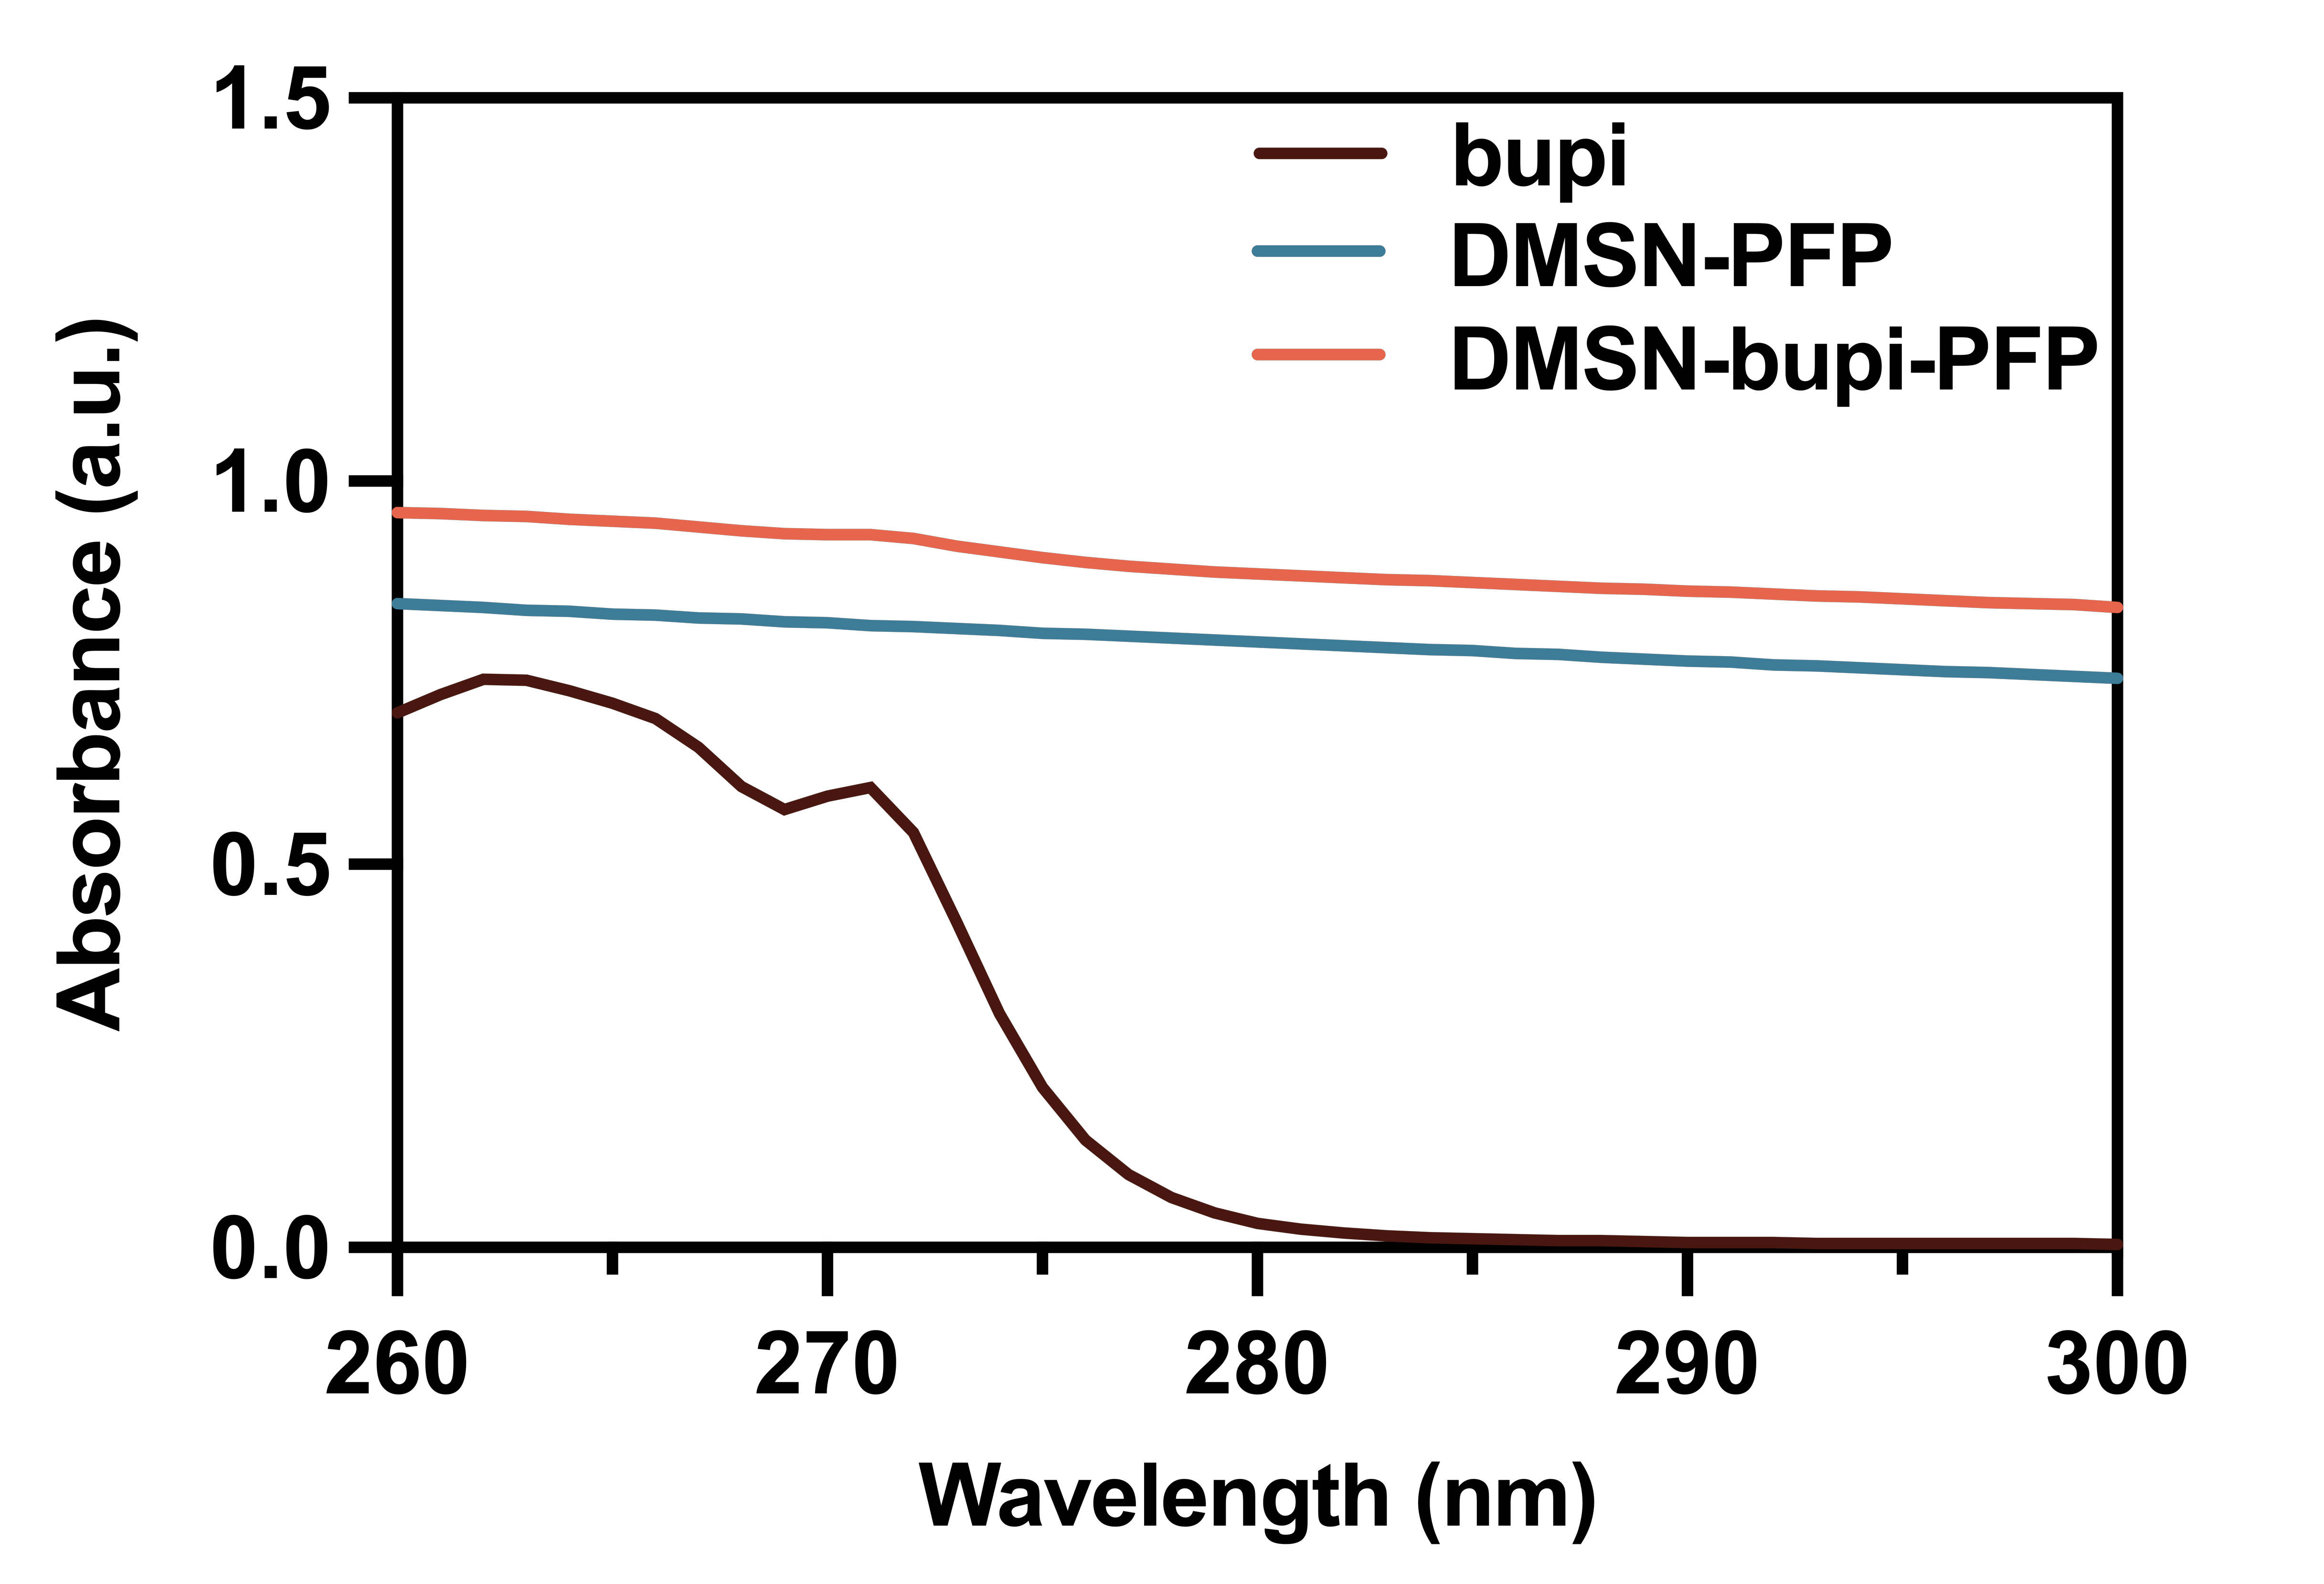


**Figure S3.** Absorption curve of levobupivacaine, DMSN-PFP, and DMSN-bupi-PFP.


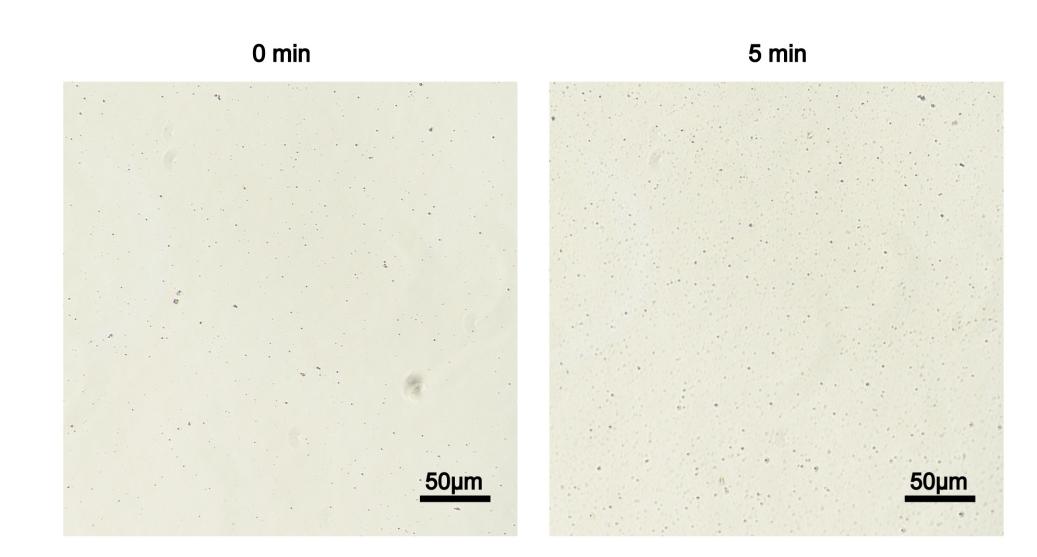


**Figure S4.** Photograph of DMSN-bupi (A) before and (B) after ultrasound treatment.
